# Supplementary material for: The Human Melanoma Side Population Displays Molecular and Functional Characteristics of Enriched Chemoresistance and Tumorigenesis
Source: PubMed Central journal article supplement (PMC3789681; doi:10.1371/journal.pone.0076550), 2013-10-03

Figure S1

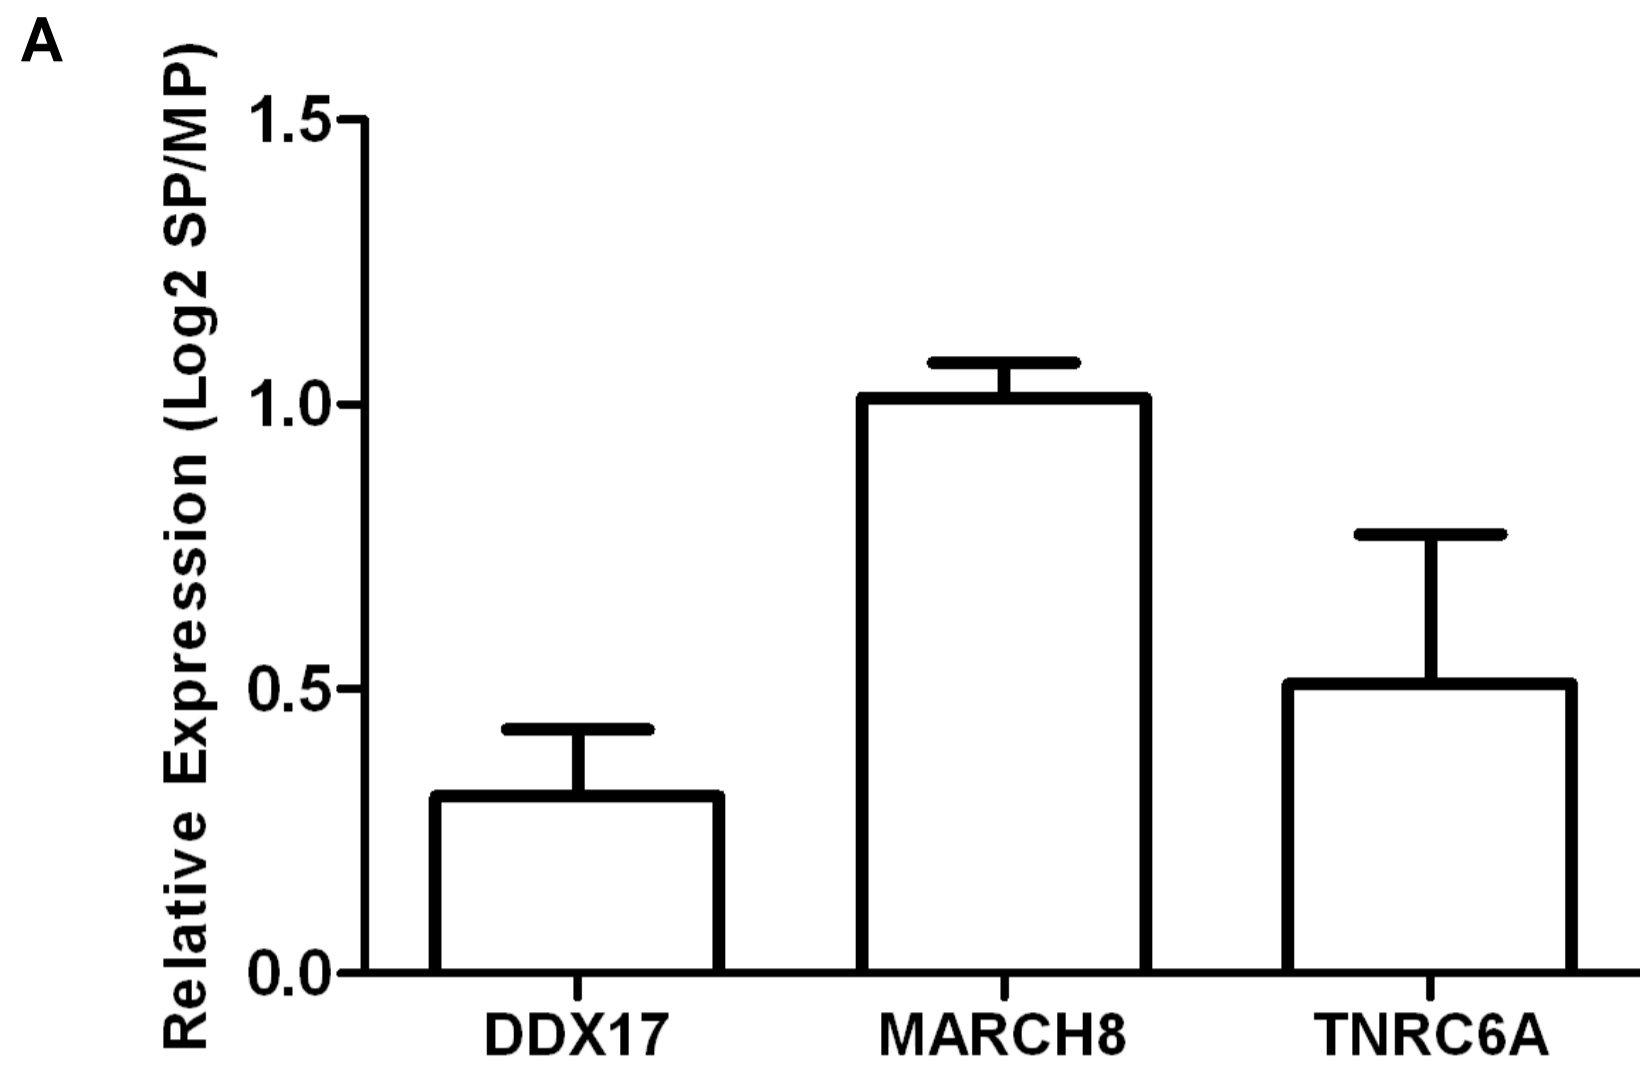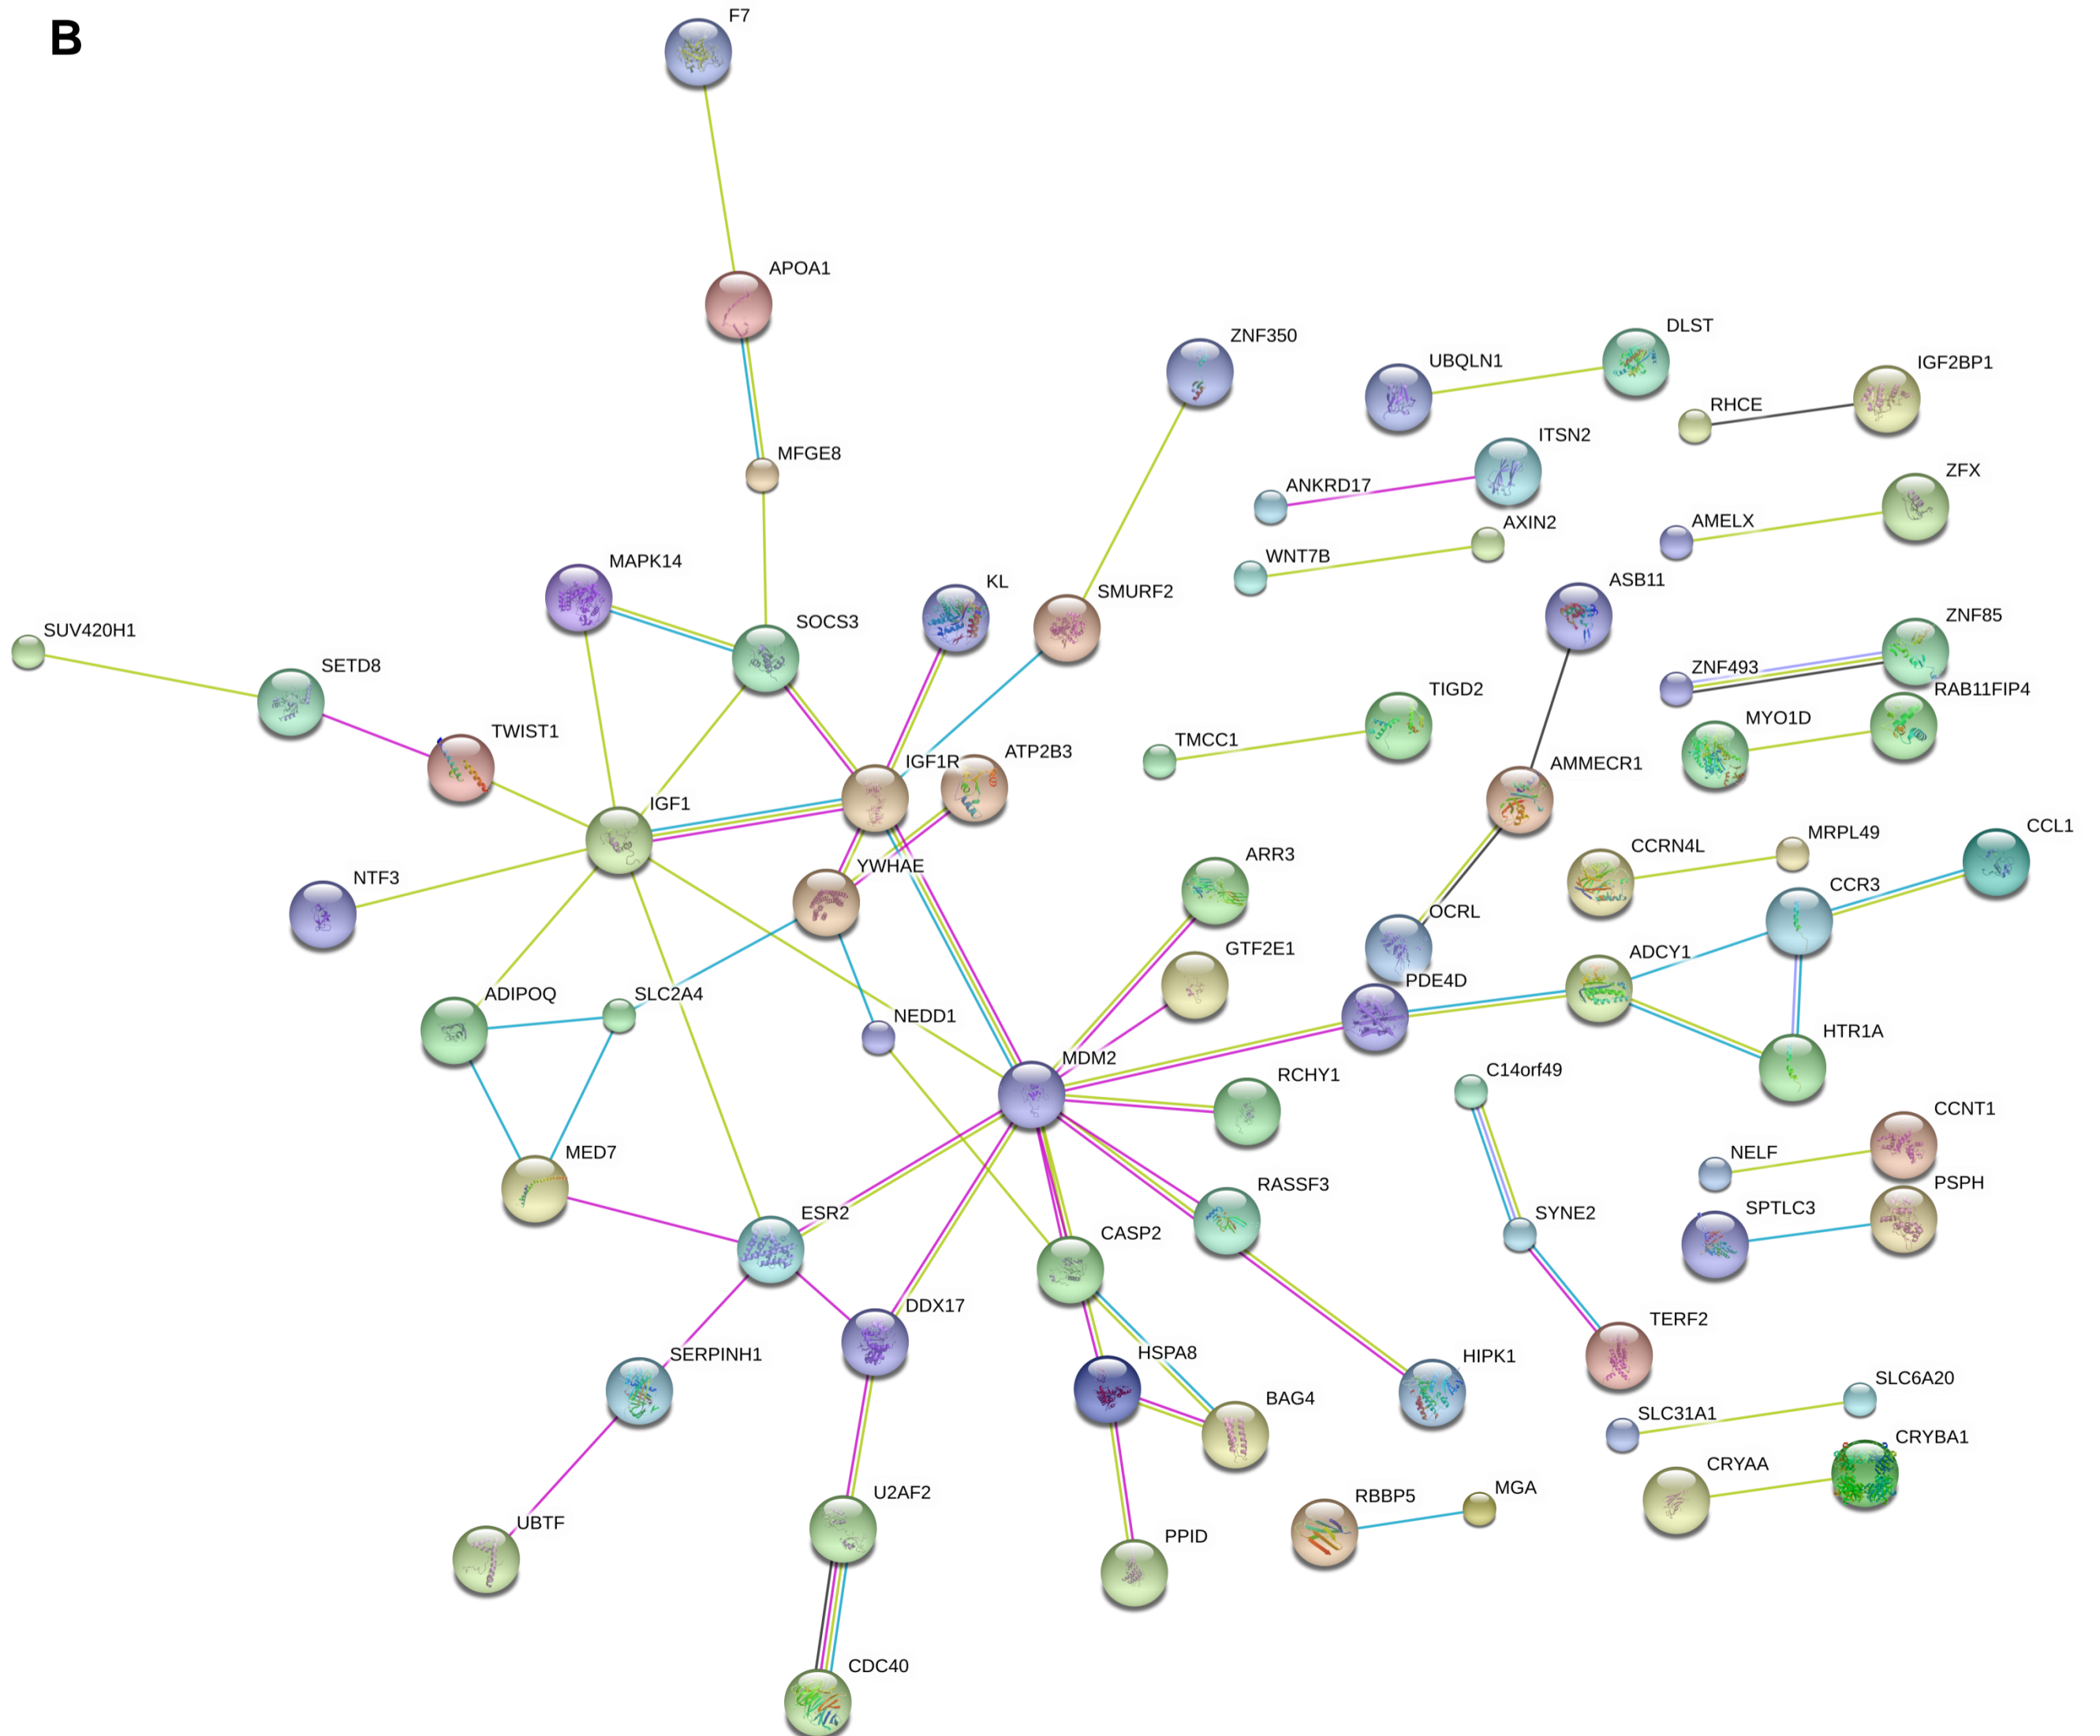

Figure S2

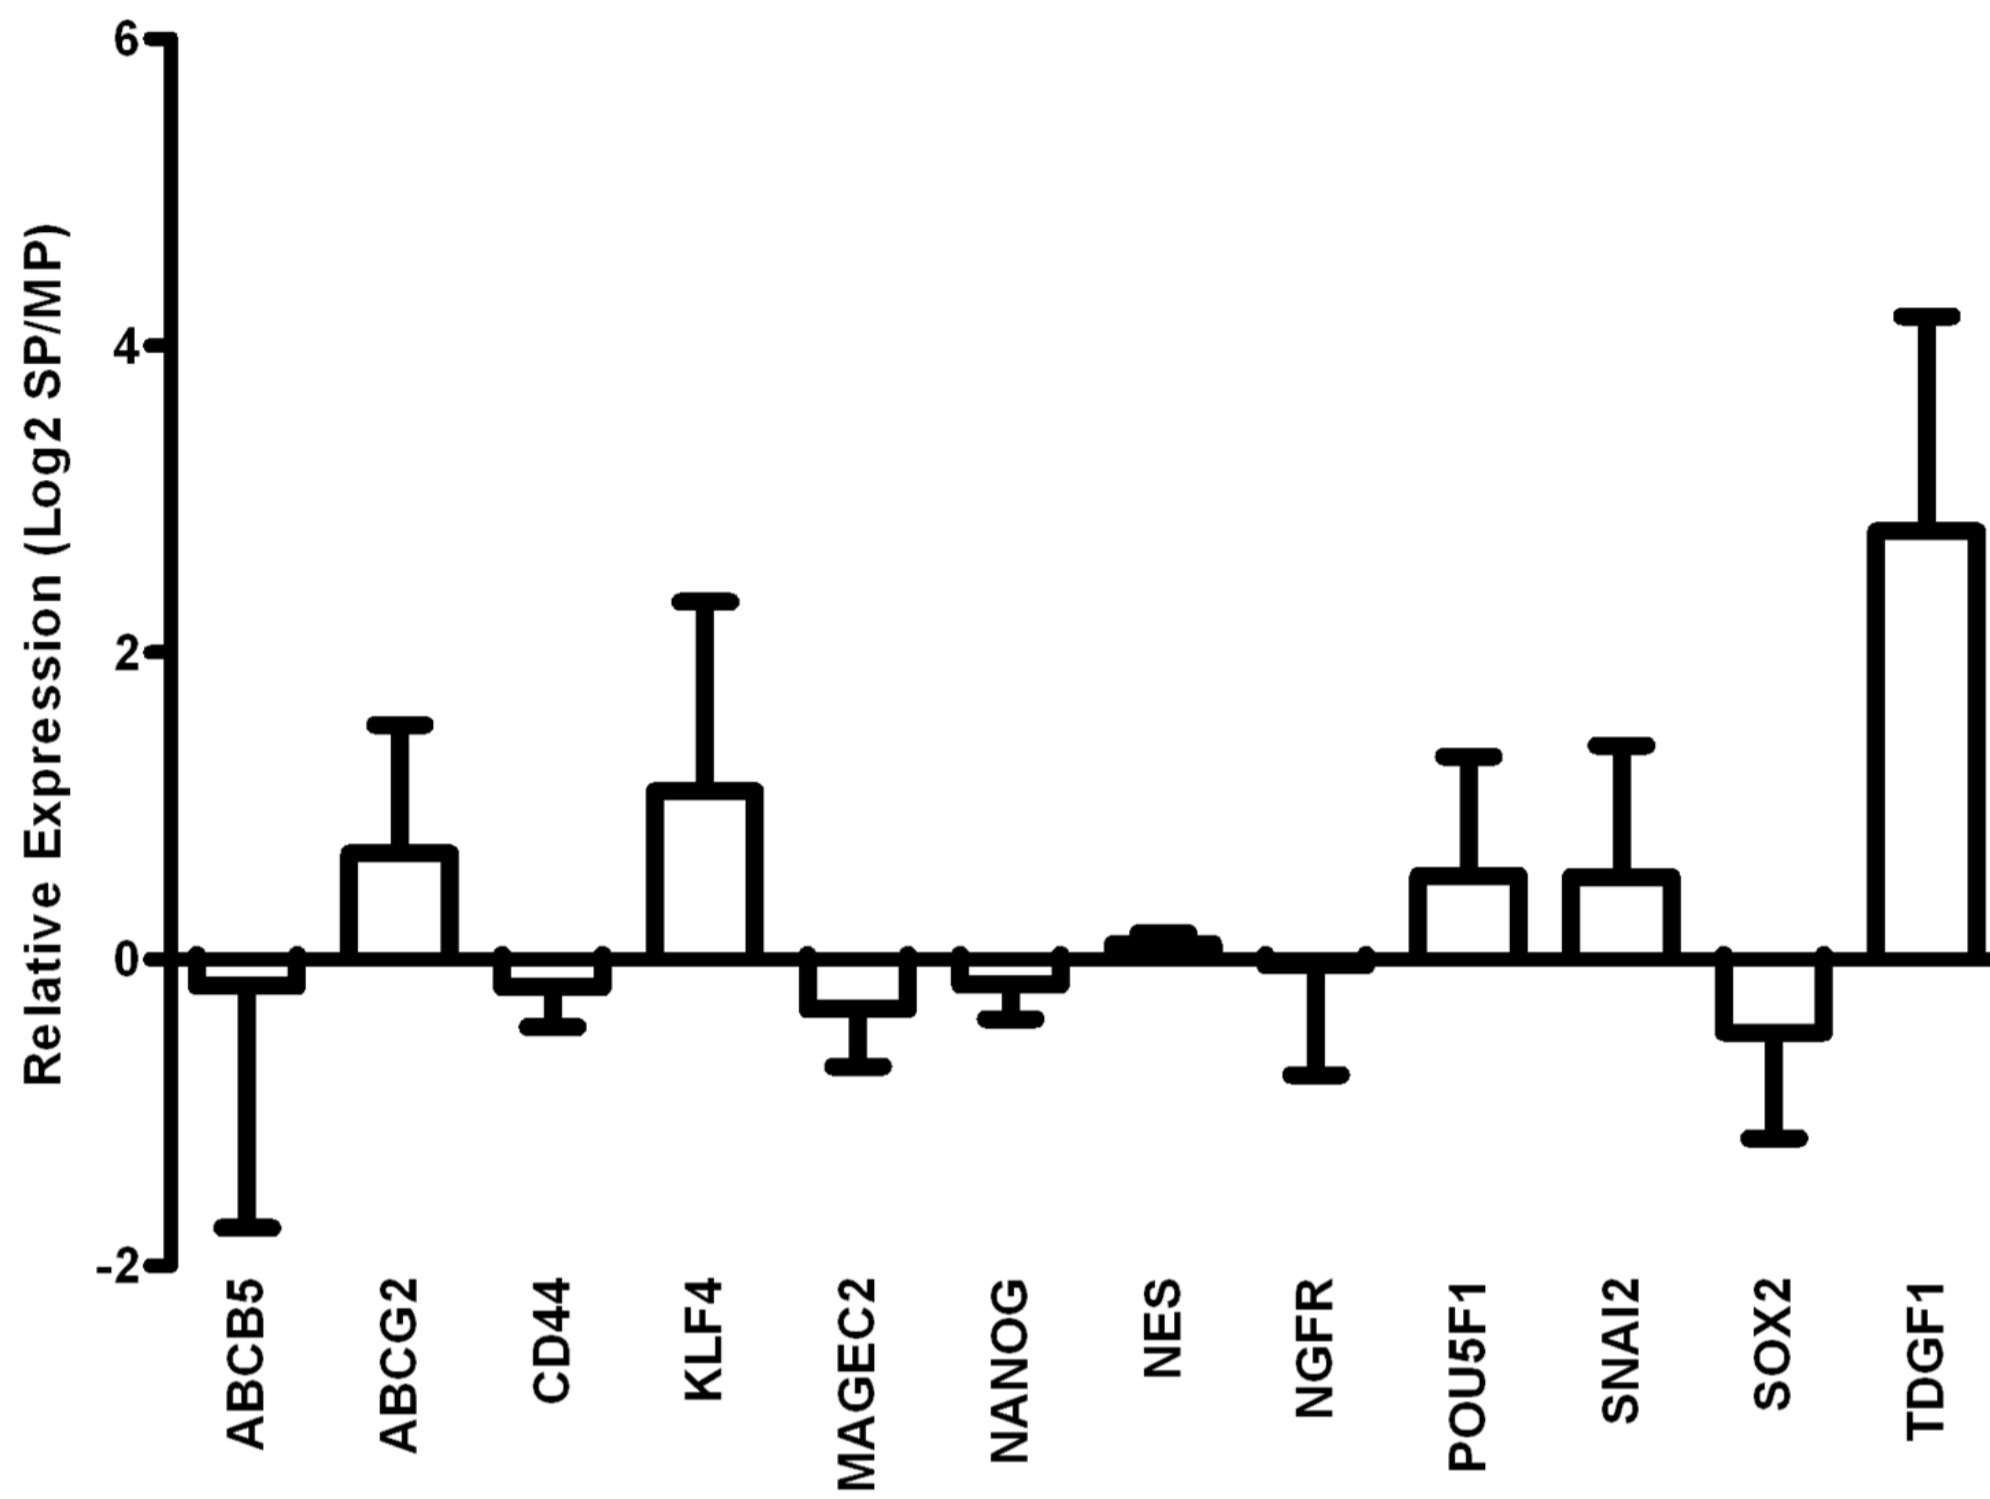

Figure S3

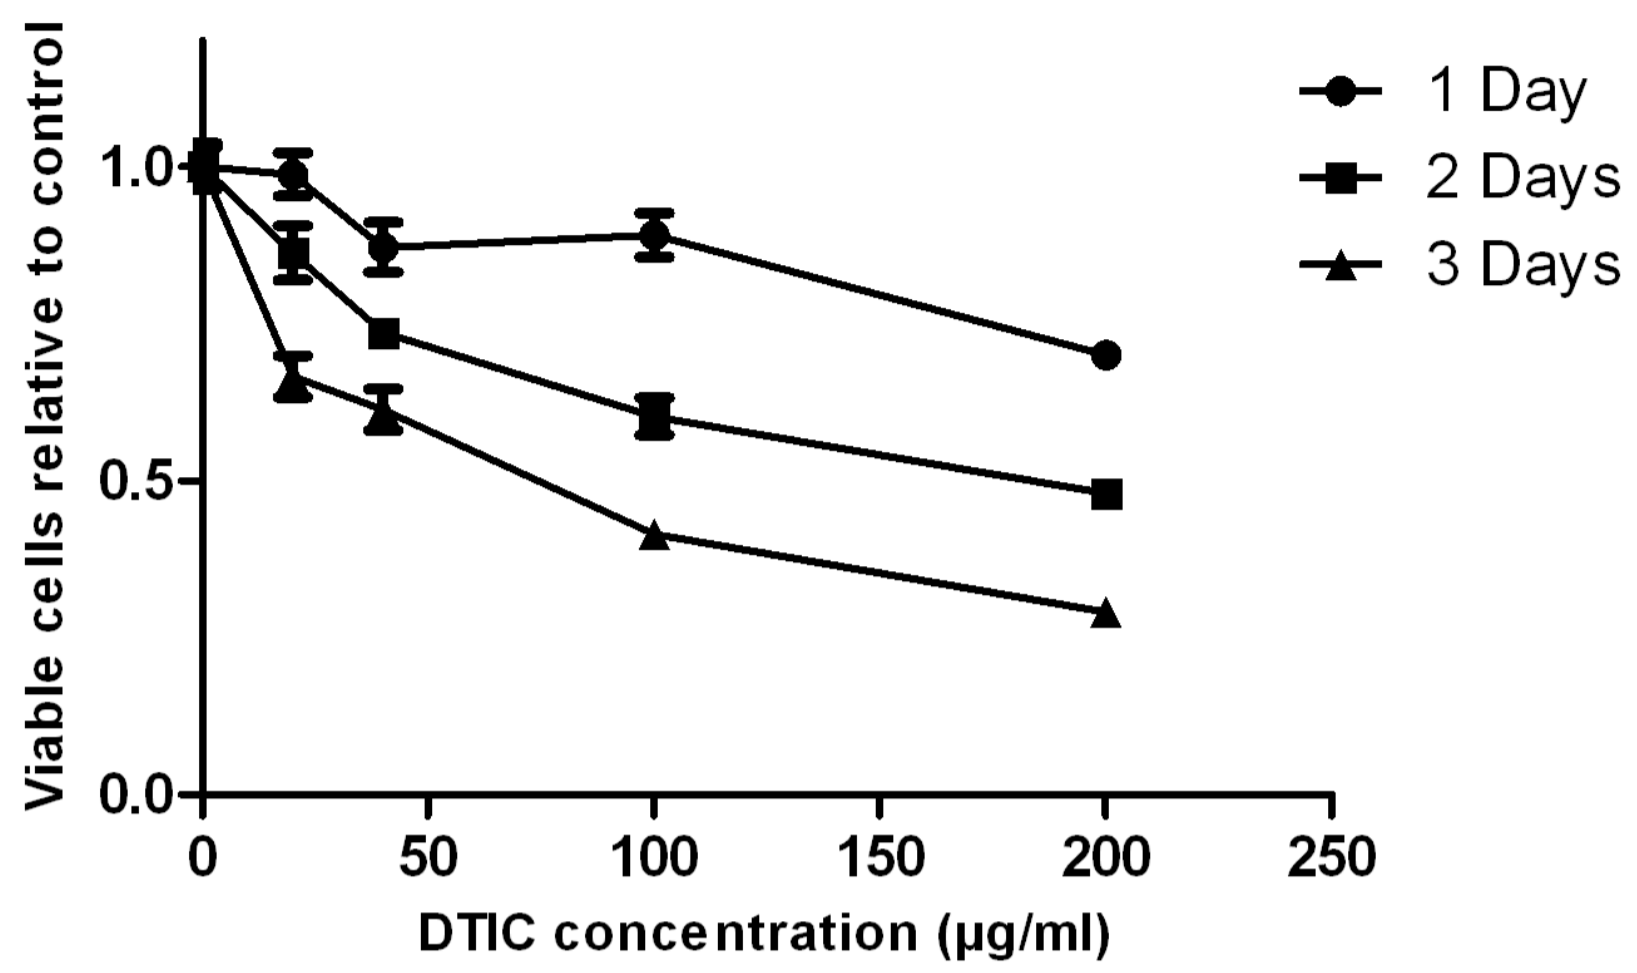



Figure S4

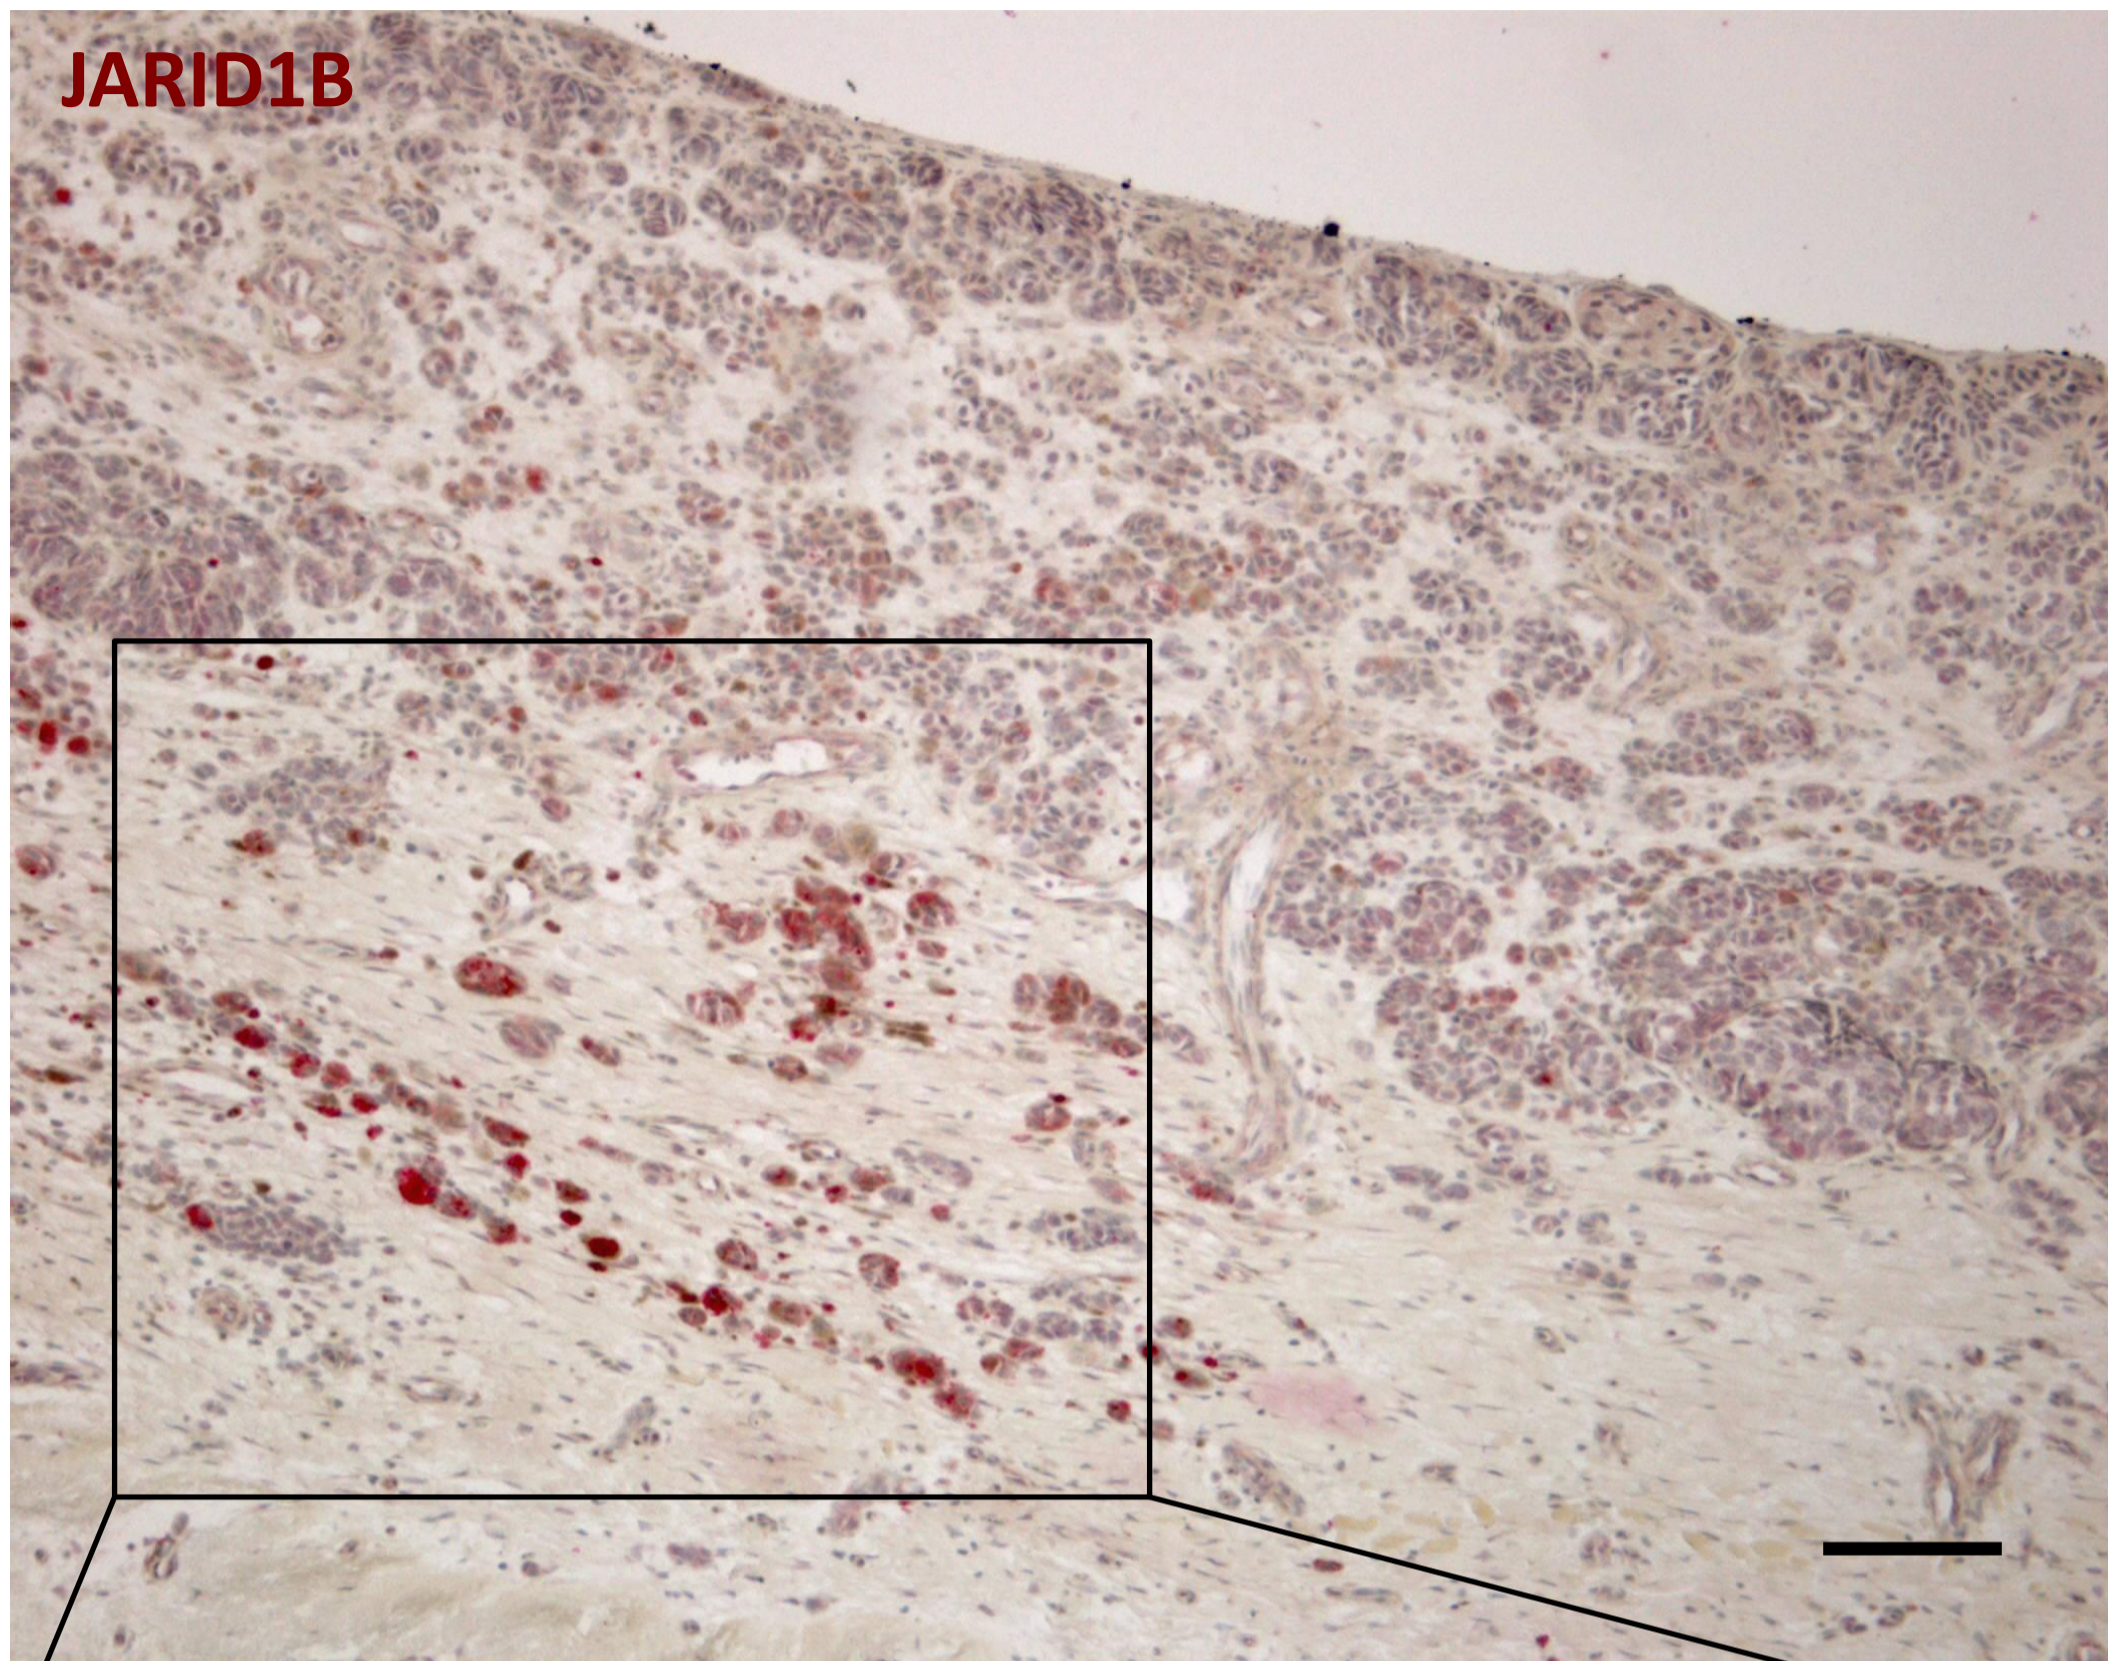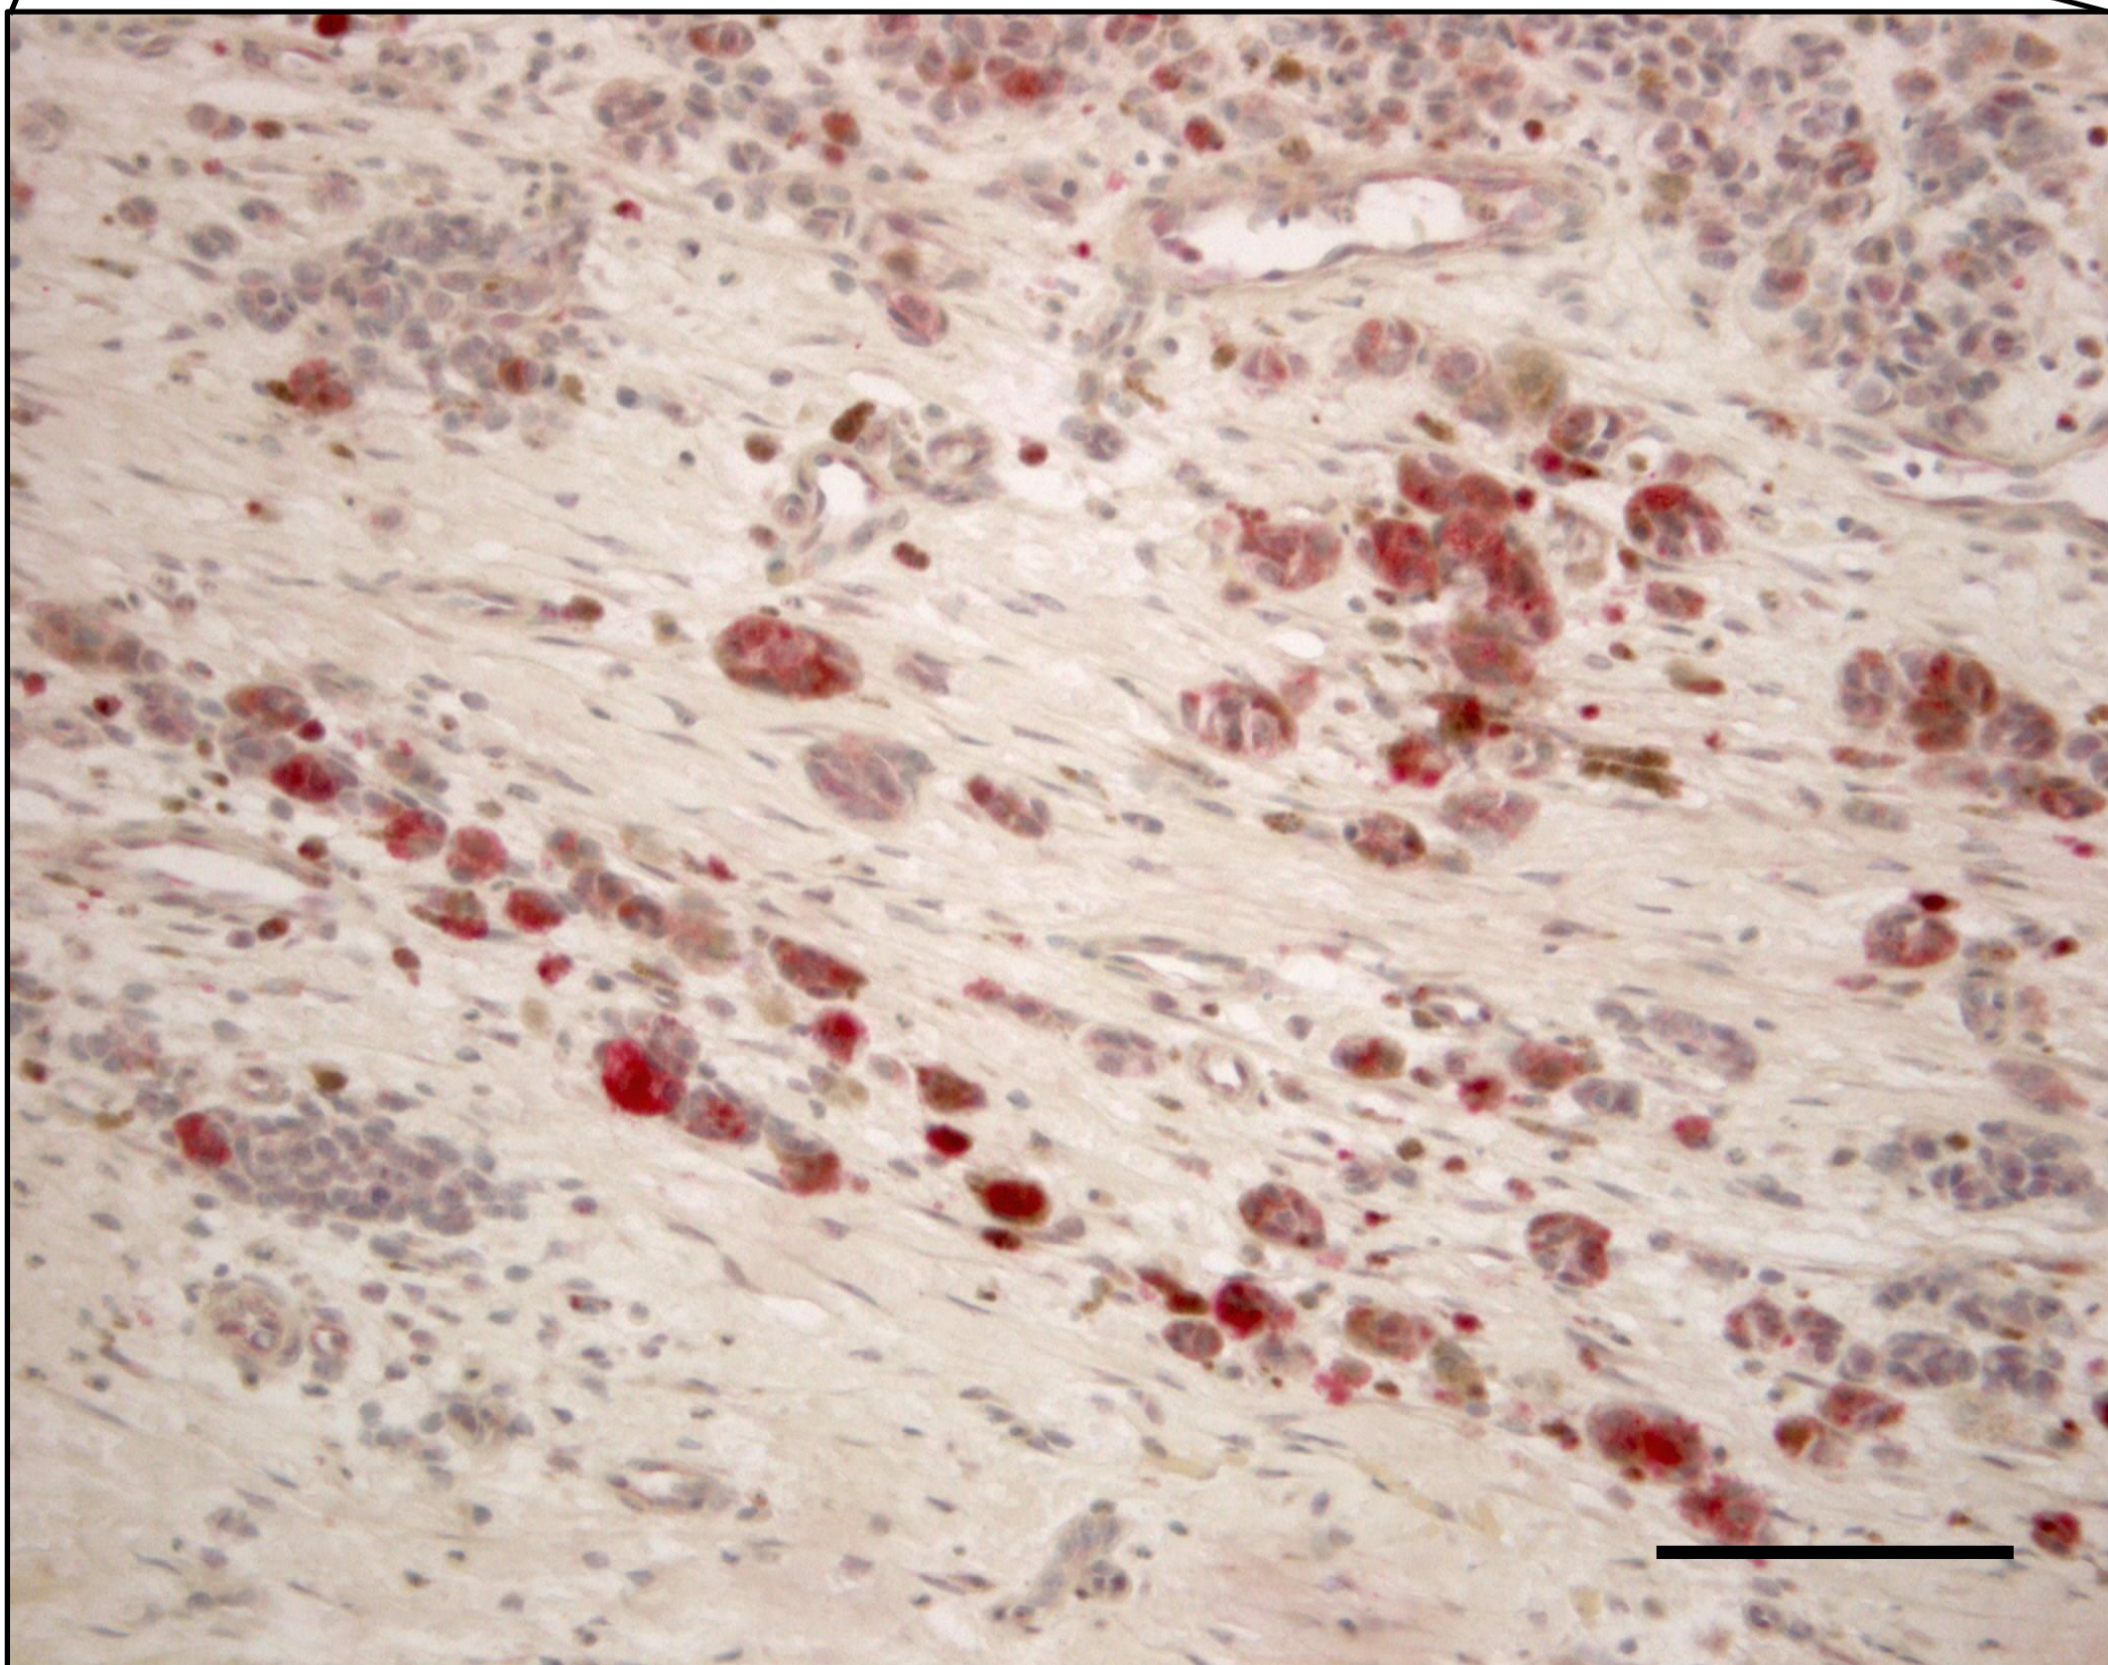

Supplement: pone.0076550.s009.pdf [file pone.0076550.s009.pdf]
